# Supplementary material
Source: PubMed Central journal article supplement (PMC4086789)
Supplement: Supp_Fig1.pdf [file Supp_Fig1.pdf]

## Supplementary Data

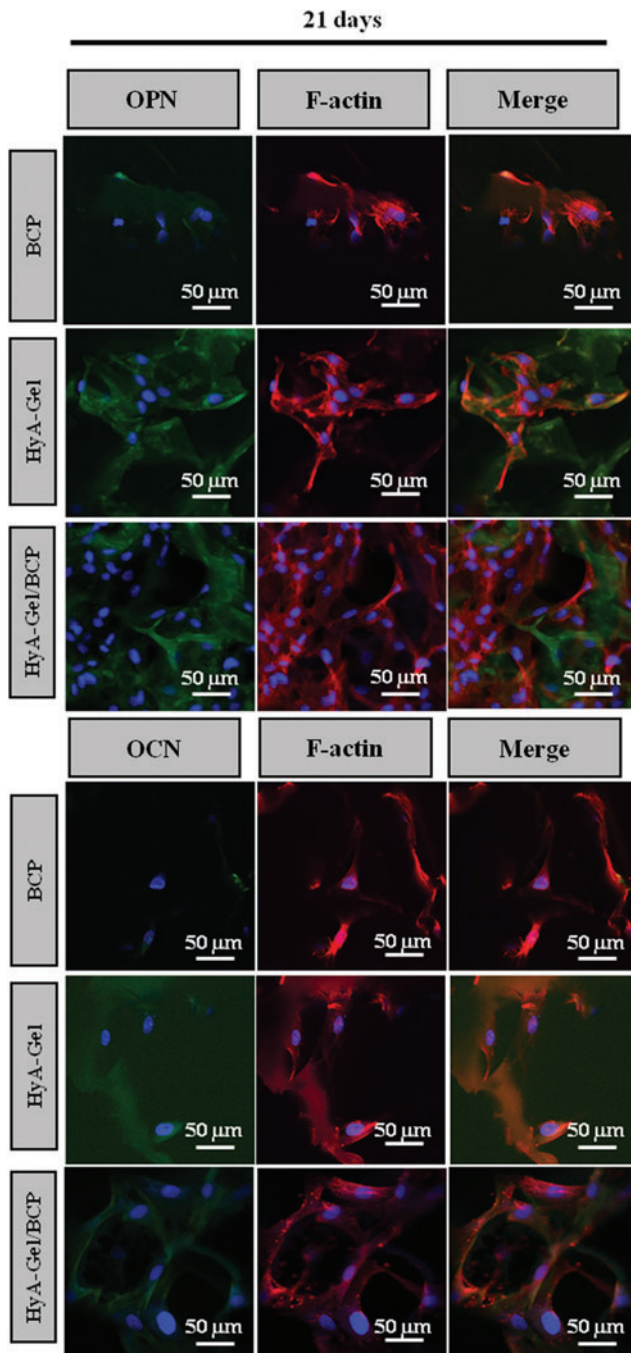

**SUPPLEMENTARY FIG. S1.** Controls in nonosteogenesis on scaffolds were assessed by osteopontin (OPN) and osteocalcin (OCN) immunostaining after 21 days. The results showed that the control scaffolds were negative for the OPN and OCN markers.
